# Supplementary material
Source: PubMed Central journal article supplement (PMC2561167)
Supplement: 97320630002461S1.pdf [file 97320630002461S1.pdf]

### Supplementary material

| Organism                                          | Accession     | Function/ annotation                                                                                                                                    |
|---------------------------------------------------|---------------|---------------------------------------------------------------------------------------------------------------------------------------------------------|
| <i>Arabidopsis thaliana</i>                       | Q9C701        | Mitotic checkpoint protein, putative AT18C15_2                                                                                                          |
| <i>Arabidopsis thaliana</i>                       | Q9LJN8        | Mitotic checkpoint protein, putative AT3G19590                                                                                                          |
| <i>Arabidopsis thaliana</i>                       | Q9SAJ0        | F23A5.2(form2) mRNA export protein, putative                                                                                                            |
| <i>Caenorhabditis elegans</i>                     | Q9XWH0        | Y54G9A.6 protein                                                                                                                                        |
| <i>Caenorhabditis elegans</i>                     | Q93454        | CAEEL Hypothetical 41.4 kDa Trp-Asp repeats containing protein F10G8.3 in chromosome I                                                                  |
| <i>Drosophila melanogaster</i>                    | Q9VAJ2        | BUB3 protein                                                                                                                                            |
| <i>Drosophila melanogaster</i>                    | Q9XYF7        | WD-40 repeat protein BUB3                                                                                                                               |
| <i>Drosophila melanogaster</i>                    | O76523        | Mitotic checkpoint control protein                                                                                                                      |
| <i>Drosophila melanogaster</i>                    | Q8MSW6        | LD23540p [BUB3]                                                                                                                                         |
| <i>Emericella nidulans</i>                        | O59902        | Spindle assembly checkpoint protein SLDB                                                                                                                |
| <i>Emericella nidulans (Aspergillus nidulans)</i> | O74224        | SONA                                                                                                                                                    |
| <i>Encephalitozoon cuciculi</i>                   | Q8SRM6        | mRNA associated protein of the RAE1 family                                                                                                              |
| <i>Encephalitozoon cuciculi</i>                   | Q8SRD0        | POLY(A)+ RNA export protein                                                                                                                             |
| <i>Encephalitozoon cuciculi</i>                   | Q8SRM6        | mRNA associated protein of the RAE1 family                                                                                                              |
| <i>Homo sapiens</i>                               | O43684        | Mitotic checkpoint protein                                                                                                                              |
| <i>Methanosarcina acetivorans str. C2A</i>        | NP_617428.1   | WD40-repeat containing protein                                                                                                                          |
| <i>Mus musculus</i>                               | AAH25089      | Budding uninhibited by benzimidazoles 3 homolog                                                                                                         |
| <i>Mus musculus</i>                               | BAC40409      | 2 days neonate thymus thymic cells cDNA, RIKEN full-length enriched library, Clone: E430019K17 product: budding uninhibited by benzimidazoles 3 homolog |
| <i>Mus musculus</i>                               | Q9WVA3        | MOUSE Mitotic checkpoint protein BUB3                                                                                                                   |
| <i>Neurospora crassa</i>                          | EAA35210      | Hypothetical protein NCU09744.1                                                                                                                         |
| <i>Neurospora crassa</i>                          | EAA31842      | Hypothetical protein                                                                                                                                    |
| <i>Oryza sativa (japonica cultivar-group)</i>     | Q84Z17        | Putative mitotic checkpoint protein                                                                                                                     |
| <i>Saccharomyces cerevisiae</i>                   | P26449        | Cell cycle arrest protein                                                                                                                               |
| <i>Saccharomyces cerevisiae</i>                   | P40066        | Hypothetical 40.5 kDa Trp-Asp repeats containing protein in NUP157-PDH5 intergenic region                                                               |
| <i>Schizosaccharomyces pombe</i>                  | O42860        | WD repeat protein, possible mitotic checkpoint                                                                                                          |
| <i>Schizosaccharomyces pombe</i>                  | P41838        | Poly(A)+ RNA export protein                                                                                                                             |
| <i>Thermomonospora curvata</i>                    | Gb_AAB05822.1 | Pkwa                                                                                                                                                    |
| <i>Thermotoga maritima</i>                        | Q9X2G1        | Beta transducin-related protein                                                                                                                         |
| <i>Xenopus laevis</i>                             | Q98UH2        | WD repeat protein BUB3                                                                                                                                  |
| <i>Xenopus laevis</i>                             | Q9YGY3        | Mitotic checkpoint                                                                                                                                      |

**Table1:** Amino acid sequences used in the current analysis.
